# Supplementary material
Source: ML conference proceedings conference paper supplement (https://openreview.net/forum?id=8GSCaoFot9)
Supplement: supplementary_material [file attachment]

## 438 A Proofs

439 We first redefine notation for clarity and then provide the proofs of the results in the main paper.

440 **Notation.** Let  $k \in N$  denote an iteration of policy evaluation (in Section 3.2).  $V^k$  denotes the  
441 true, tabular (or functional) V-function iterate in the MDP, without any correction.  $\hat{V}^k$  denotes the  
442 approximate tabular (or functional) V-function iterate.

443 The empirical Bellman operator can be expressed as follows:

$$(\hat{\mathcal{B}}^\pi \hat{V}^k)(s) = E_{a \sim \pi(a|s)} \hat{r}(s, a) + \gamma \sum_{s'} E_{a \sim \pi(a|s)} \hat{P}(s'|s, a) [\hat{V}^k(s')] \quad (10)$$

444 where  $\hat{r}(s, a)$  is the empirical average reward obtained in the dataset when performing action  $a$  at  
445 state  $s$ . The true Bellman operator can be expressed as follows:

$$(\mathcal{B}^\pi V^k)(s) = E_{a \sim \pi(a|s)} r(s, a) + \gamma \sum_{s'} E_{a \sim \pi(a|s)} P(s'|s, a) [V^k(s')] \quad (11)$$

446 Now we first prove that the iteration in Eq.2 has a fixed point. Assume state value function is lower  
447 bounded, i.e.,  $V(s) \geq C \forall s \in S$ , then Eq.2 can always be solved with Eq.3. Thus, we only need to  
448 investigate the iteration in Eq.3.

449 Denote the iteration as a function operator  $\mathcal{T}^\pi$  on  $V$ . Suppose  $\text{supp } d \subseteq \text{supp } d_u$ , then the operator  
450  $\mathcal{T}^\pi$  is a  $\gamma$ -contraction in  $L_\infty$  norm where  $\gamma$  is the discounting factor.

451 **Proof of Lemma 3.1:** Let  $V$  and  $V'$  are any two state value functions with the same support, i.e.,  
452  $\text{supp } V = \text{supp } V'$ .

$$\begin{aligned} |(\mathcal{T}^\pi V - \mathcal{T}^\pi V')(s)| &= \left| (\hat{\mathcal{B}}^\pi V(s) - \alpha \left[ \frac{d(s)}{d_u(s)} - 1 \right]) - (\hat{\mathcal{B}}^\pi V'(s) - \alpha \left[ \frac{d(s)}{d_u(s)} - 1 \right]) \right| \\ &= \left| \hat{\mathcal{B}}^\pi V(s) - \hat{\mathcal{B}}^\pi V'(s) \right| \\ &= \left| (E_{a \sim \pi(a|s)} \hat{r}(s, a) + \gamma E_{a \sim \pi(a|s)} \sum_{s'} \hat{P}(s'|s, a) V(s')) \right. \\ &\quad \left. - (E_{a \sim \pi(a|s)} \hat{r}(s, a) + \gamma E_{a \sim \pi(a|s)} \sum_{s'} \hat{P}(s'|s, a) V'(s')) \right| \\ &= \gamma \left| E_{a \sim \pi(a|s)} \sum_{s'} \hat{P}(s'|s, a) [V(s') - V'(s')] \right| \end{aligned}$$

$$\begin{aligned} \|\mathcal{T}^\pi V - \mathcal{T}^\pi V'\|_\infty &= \max_s |(\mathcal{T}^\pi V - \mathcal{T}^\pi V')(s)| \\ &= \max_s \gamma \left| E_{a \sim \pi(a|s)} \sum_{s'} \hat{P}(s'|s, a) [V(s') - V'(s')] \right| \\ &\leq \gamma E_{a \sim \pi(a|s)} \sum_{s'} \hat{P}(s'|s, a) \max_{s''} |V(s'') - V'(s'')| \\ &= \gamma \max_{s''} |V(s'') - V'(s'')| \\ &= \gamma \|(V - V')\|_\infty \end{aligned}$$

453

□

454 We present the bound on using empirical Bellman operator compared to the true Bellman operator.  
455 Following previous work [4], we make the following assumptions that:  $P^\pi$  is the transition matrix  
456 coupled with policy, specifically,  $P^\pi V(s) = E_{a' \sim \pi(a'|s), s' \sim P(s'|s, a')} [V(s')]$

457 **Assumption A.1.**  $\forall s, a \in \mathcal{M}$ , the following relationships hold with at least  $(1 - \delta)$  ( $\delta \in (0, 1)$ )  
458 probability,

$$|r - r(s, a)| \leq \frac{C_{r, \delta}}{\sqrt{|D(s, a)|}}, \|\hat{P}(s'|s, a) - P(s'|s, a)\|_1 \leq \frac{C_{P, \delta}}{\sqrt{|D(s, a)|}} \quad (12)$$

459 Under this assumption, the absolute difference between the empirical Bellman operator and the actual  
 460 one can be calculated as follows:

$$|(\hat{\mathcal{B}}^\pi \hat{V}^k - (\mathcal{B}^\pi) \hat{V}^k)| = E_{a \sim \pi(a|s)} |r - r(s, a) + \gamma \sum_{s'} E_{a' \sim \pi(a'|s')} (\hat{P}(s'|s, a) - P(s'|s, a)) [\hat{V}^k(s')]| \quad (13)$$

$$\leq E_{a \sim \pi(a|s)} |r - r(s, a)| + \gamma \sum_{s'} E_{a' \sim \pi(a'|s')} (\hat{P}(s'|s, a') - P(s'|s, a')) [\hat{V}^k(s')]| \quad (14)$$

$$\leq E_{a \sim \pi(a|s)} \frac{C_{r,\delta} + \gamma C_{P,\delta} 2R_{max}/(1-\gamma)}{\sqrt{|D(s, a)|}} \quad (15)$$

461 Thus, the estimation error due to sampling error can be bounded by a constant as a function of  $C_{r,\delta}$   
 462 and  $C_{t,\delta}$ . We define this constant as  $C_{r,T,\delta}$ .

463 Thus we obtain:

$$\forall V, s \in D, |\hat{\mathcal{B}}^\pi V(s) - \mathcal{B}^\pi V(s)| \leq E_{a \sim \pi(a|s)} \frac{C_{r,t,\delta}}{(1-\gamma)\sqrt{|D(s, a)|}} \quad (16)$$

464 Next we provide an important lemma.

465 **Lemma A.2.** (Interpolation Lemma) For any  $f \in [0, 1]$ , and any given distribution  $\rho(s)$ , let  $d_f$  be  
 466 an  $f$ -interpolation of  $\rho$  and  $D$ , i.e.,  $d_f(s) := fd(s) + (1-f)\rho(s)$ , let  $v(\rho, f) := E_{s \sim \rho(s)} [\frac{\rho(s)-d(s)}{d_f(s)}]$ ,  
 467 then  $v(\rho, f)$  satisfies  $v(\rho, f) \geq 0$ .

468 The proof can be found in [6]. By setting  $f$  as 1, we have  $E_{s \sim \rho(s)} [\frac{\rho(s)-d(s)}{d(s)}] > 0$ .

469 **Proof of Theorem 3.2:** The  $V$  function of approximate dynamic programming in iteration  $k$  can be  
 470 obtained as:

$$\hat{V}^{k+1}(s) = \hat{\mathcal{B}}^\pi \hat{V}^k(s) - \alpha \left[ \frac{d(s)}{d_u(s)} - 1 \right] \forall s, k \quad (17)$$

471 The fixed point:

$$\hat{V}^\pi(s) = \hat{\mathcal{B}}^\pi \hat{V}^\pi(s) - \alpha \left[ \frac{d(s)}{d_u(s)} - 1 \right] \leq \mathcal{B}^\pi \hat{V}^\pi(s) + E_{a \sim \pi(a|s)} \frac{C_{r,t,\delta} R_{max}}{(1-\gamma)\sqrt{|D(s, a)|}} - \alpha \left[ \frac{d(s)}{d_u(s)} - 1 \right] \quad (18)$$

472 Thus we obtain:

$$\hat{V}^\pi(s) \leq V^\pi(s) + (I - \gamma P^\pi)^{-1} E_{a \sim \pi(a|s)} \frac{C_{r,t,\delta} R_{max}}{(1-\gamma)\sqrt{|D(s, a)|}} - \alpha (I - \gamma P^\pi)^{-1} \left[ \frac{d(s)}{d_u(s)} - 1 \right] \quad (19)$$

473 , where  $P^\pi$  is the transition matrix coupled with the policy  $\pi$  and  $P^\pi V(s) =$   
 474  $E_{a' \sim \pi(a'|s')} s' \sim P(s'|s, a') [V(s')]$ .

475 Then the expectation of  $V^\pi(s)$  under distribution  $d(s)$  satisfies:

$$E_{s \sim d(s)} \hat{V}^\pi(s) \leq E_{s \sim d(s)} (V^\pi(s)) + E_{s \sim d(s)} (I - \gamma P^\pi)^{-1} E_{a \sim \pi(a|s)} \frac{C_{r,t,\delta} R_{max}}{(1-\gamma)\sqrt{|D(s, a)|}} - \underbrace{\alpha E_{s \sim d(s)} (I - \gamma P^\pi)^{-1} \left[ \frac{d(s)}{d_u(s)} - 1 \right]}_{>0} \quad (20)$$

476 When  $\alpha \geq \frac{E_{s \sim d(s)} E_{a \sim \pi(a|s)} \frac{C_{r,t,\delta} R_{max}}{(1-\gamma)\sqrt{|D(s, a)|}}}{E_{s \sim d(s)} \left[ \frac{d(s)}{d_u(s)} - 1 \right]}$ ,  $E_{s \sim d(s)} \hat{V}^\pi(s) \leq E_{s \sim d(s)} (V^\pi(s))$ .  $\square$

477 **Proof of Theorem 3.3:** The expectation of  $V^\pi(s)$  under distribution  $d(s)$  satisfies:

$$E_{s \sim d_u(s)} \hat{V}^\pi(s) \leq E_{s \sim d_u(s)}(V^\pi(s)) + E_{s \sim d_u(s)}(I - \gamma P^\pi)^{-1} E_{a \sim \pi(a|s)} \frac{C_{r,t,\delta} R_{max}}{(1 - \gamma) \sqrt{|D(s, a)|}} \\ - \alpha E_{s \sim d_u(s)}(I - \gamma P^\pi)^{-1} \left[ \frac{d(s)}{d_u(s)} - 1 \right] \quad (21)$$

478 Noticed that the last term:

$$\sum_{s \sim d_u(s)} \left( \frac{d_f(s)}{d_u(s)} - 1 \right) = \sum_s d_u(s) \left( \frac{d_f(s)}{d_u(s)} - 1 \right) = \sum_s d_f(s) - \sum_s d_u(s) = 0 \quad (22)$$

479 We obtain that:

$$E_{s \sim d_u(s)} \hat{V}^\pi(s) \leq E_{s \sim d_u(s)}(V^\pi(s)) + E_{s \sim d_u(s)}(I - \gamma P^\pi)^{-1} E_{a \sim \pi(a|s)} \frac{C_{r,t,\delta} R_{max}}{(1 - \gamma) \sqrt{|D(s, a)|}} \quad (23)$$

480

□

481 **Proof of Theorem 3.4:** Recall that the expression of the V-function iterate is given by:

$$\hat{V}^{k+1}(s) = \mathcal{B}^{\pi^k} \hat{V}^k(s) - \alpha \left[ \frac{d(s)}{d_u(s)} - 1 \right] \forall s, k \quad (24)$$

482 Now the expectation of  $V^\pi(s)$  under distribution  $d_u(s)$  is given by:

$$E_{s \sim d_u(s)} \hat{V}^{k+1}(s) = E_{s \sim d_u(s)} \left[ \mathcal{B}^{\pi^k} \hat{V}^k(s) - \alpha \left[ \frac{d(s)}{d_u(s)} - 1 \right] \right] = E_{s \sim d_u(s)} \mathcal{B}^{\pi^k} \hat{V}^k(s) \quad (25)$$

483 The expectation of  $V^\pi(s)$  under distribution  $d(s)$  is given by:

$$E_{s \sim d(s)} \hat{V}^{k+1}(s) = E_{s \sim d(s)} \mathcal{B}^{\pi^k} \hat{V}^k(s) - \alpha \left[ \frac{d(s)}{d_u(s)} - 1 \right] = E_{s \sim d(s)} \mathcal{B}^{\pi^k} \hat{V}^k(s) - \alpha E_{s \sim d(s)} \left[ \frac{d(s)}{d_u(s)} - 1 \right] \quad (26)$$

484 Thus we can show that:

$$E_{s \sim d_u(s)} \hat{V}^{k+1}(s) - E_{s \sim d(s)} \hat{V}^{k+1}(s) = E_{s \sim d_u(s)} \mathcal{B}^{\pi^k} \hat{V}^k(s) - E_{s \sim d(s)} \mathcal{B}^{\pi^k} \hat{V}^k(s) + \alpha E_{s \sim d(s)} \left[ \frac{d(s)}{d_u(s)} - 1 \right] \\ = E_{s \sim d_u(s)} V^{k+1}(s) - E_{s \sim d(s)} V^{k+1}(s) - E_{s \sim d(s)} [\mathcal{B}^{\pi^k} (\hat{V}^k - V^k)] \\ + E_{s \sim d_u(s)} [\mathcal{B}^{\pi^k} (\hat{V}^k - V^k)] + \alpha E_{s \sim d(s)} \left[ \frac{d(s)}{d_u(s)} - 1 \right] \quad (27)$$

485 By choosing  $\alpha$ :

$$\alpha > \frac{E_{s \sim d(s)} [\mathcal{B}^{\pi^k} (\hat{V}^k - V^k)] - E_{s \sim d_u(s)} [\mathcal{B}^{\pi^k} (\hat{V}^k - V^k)]}{E_{s \sim d(s)} \left[ \frac{d(s)}{d_u(s)} - 1 \right]} \quad (28)$$

486 We have  $E_{s \sim d_u(s)} \hat{V}^{k+1}(s) - E_{s \sim d(s)} \hat{V}^{k+1}(s) > E_{s \sim d_u(s)} V^{k+1}(s) - E_{s \sim d(s)} V^{k+1}(s)$  hold. □

487 **Proof of Theorem 3.5:**  $\hat{V}$  is obtained by solving the recursive Bellman fixed point equation in the empirical MDP, with an altered reward,  $r(s, a) - \alpha \left[ \frac{d(s)}{d_u(s)} - 1 \right]$ , hence the optimal policy  $\pi^*(a|s)$  obtained by optimizing the value under Eq. 3.5. □

490 **Proof of Theorem 3.6:** The proof of this statement is divided into two parts. We first relates the return of  $\pi^*$  in the empirical MDP  $\hat{M}$  with the return of  $\pi_\beta$ , we can get:

$$J(\pi^*, \hat{M}) - \alpha \frac{1}{1 - \gamma} \mathbb{E}_{s \sim d_{\hat{M}}^{\pi^*}(s)} \left[ \frac{d(s)}{d_u(s)} - 1 \right] \geq J(\pi_\beta, \hat{M}) - 0 = J(\pi_\beta, \hat{M}) \quad (29)$$

492 The next step is to bound the difference between  $J(\pi_\beta, \hat{M})$  and  $J(\pi_\beta, M)$  and the difference between  $J(\pi^*, \hat{M})$  and  $J(\pi^*, M)$ . We quote a useful lemma from [4] (Lemma D.4.1):

---

**Algorithm 1** CSVE based Offline RL Algorithm
 

---

**Input:** data  $D = \{(s, a, r, s')\}$   
**Parametered Models:**  $Q_\theta, V_\psi, \pi_\phi, \bar{Q}_{\bar{\theta}}, M_\nu$   
**Hyperparameters:**  $\alpha, \lambda$ , learning rates  $\eta_\theta, \eta_\psi, \eta_\phi, \omega$   
 $\triangleright$  Train the transition model with the static dataset  $D$   
 $M_\nu \leftarrow \text{train}(D)$ .  
 $\triangleright$  Train the conservative value estimation and policy functions  
 Initialize function parameters  $\theta_0, \psi_0, \phi_0, \bar{\theta}_0 = \theta_0$   
**for** step  $k = 1$  **to**  $N$  **do**  
    $\psi_k \leftarrow \psi_{k-1} - \eta_\psi \nabla_\psi L_V^\pi(V_\psi; \bar{Q}_{\theta_k})$   
    $\theta_k \leftarrow \theta_{k-1} - \eta_\theta \nabla_\theta L_Q^\pi(Q_\theta; \hat{V}_{\psi_k})$   
    $\phi_k \leftarrow \phi_{k-1} - \eta_\phi \nabla_\phi L_\pi^+(\pi_\phi)$   
    $\bar{\theta}_k \leftarrow \omega \bar{\theta}_{k-1} + (1 - \omega)\theta_k$   
**end for**

---

494 **Lemma A.3.** For any MDP  $M$ , an empirical MDP  $\hat{M}$  generated by sampling actions according to  
 495 the behavior policy  $\pi_\beta$  and a given policy  $\pi$ ,

$$|J(\pi, \hat{M}) - J(\pi, M)| \leq \left( \frac{C_{r,\delta}}{1-\gamma} + \frac{\gamma R_{max} C_{T,\delta}}{(1-\gamma)^2} \right) \mathbb{E}_{s \sim d_{\hat{M}}^{\pi^*}(s)} \left[ \frac{\sqrt{|\mathcal{A}|}}{\sqrt{|\mathcal{D}(s)|}} \sqrt{E_{a \sim \pi(a|s)} \left( \frac{\pi(a|s)}{\pi_\beta(a|s)} \right)} \right] \quad (30)$$

496 Setting  $\pi$  in the above lemma as  $\pi_\beta$ , we get:

$$|J(\pi_\beta, \hat{M}) - J(\pi_\beta, M)| \leq \left( \frac{C_{r,\delta}}{1-\gamma} + \frac{\gamma R_{max} C_{T,\delta}}{(1-\gamma)^2} \right) \mathbb{E}_{s \sim d_{\hat{M}}^{\pi^*}(s)} \left[ \frac{\sqrt{|\mathcal{A}|}}{\sqrt{|\mathcal{D}(s)|}} \sqrt{E_{a \sim \pi^*(a|s)} \left( \frac{\pi^*(a|s)}{\pi_\beta(a|s)} \right)} \right] \quad (31)$$

497 given that  $\sqrt{E_{a \sim \pi^*(a|s)} \left[ \frac{\pi^*(a|s)}{\pi_\beta(a|s)} \right]}$  is a pointwise upper bound of  $\sqrt{E_{a \sim \pi_\beta(a|s)} \left[ \frac{\pi_\beta(a|s)}{\pi_\beta(a|s)} \right]}$  ([4]). Thus we  
 498 get,

$$\begin{aligned}
 J(\pi^*, \hat{M}) &\geq J(\pi_\beta, \hat{M}) - 2 \left( \frac{C_{r,\delta}}{1-\gamma} + \frac{\gamma R_{max} C_{T,\delta}}{(1-\gamma)^2} \right) \mathbb{E}_{s \sim d_{\hat{M}}^{\pi^*}(s)} \left[ \frac{\sqrt{|\mathcal{A}|}}{\sqrt{|\mathcal{D}(s)|}} \sqrt{E_{a \sim \pi^*(a|s)} \left( \frac{\pi^*(a|s)}{\pi_\beta(a|s)} \right)} \right] \\
 &\quad + \alpha \frac{1}{1-\gamma} \mathbb{E}_{s \sim d_{\hat{M}}^{\pi^*}(s)} \left[ \frac{d(s)}{d_u(s)} - 1 \right]
 \end{aligned} \quad (32)$$

499 which completes the proof.  $\square$

500 Here, the second term is sampling error which occurs due to mismatch of  $\hat{M}$  and  $M$ ; the third term  
 501 denotes the increase in policy performance due to CSVE in  $\hat{M}$ . Note that when the first term is small,  
 502 the smaller value of  $\alpha$  are able to provide an improvement compared to the behavior policy.

## 503 B CSVE Algorithm and Implementation Details

504 In section 4, we have given the complete formula descriptions of a practical offline RL algorithm  
 505 of CSVE. Here we put all together and describe the practical deep offline reinforcement learning  
 506 algorithm in Alg. 1. In particular, the dynamic model model, value functions and policy are all  
 507 parameterized with deep neural networks and trained via stochastic gradient decent methods.

508 We implement our method based on an offline deep reinforcement learning library d3rlpy [33]. The  
 509 code is available at: <https://github.com/2023AnonymousAuthor/csve> .

### 510 B.1 Additional ablation study

511 **Effect of exploration on near states.** We analyze the impact of varying the factor  $\lambda$  in Eq. 9, which  
 512 controls the intensity on such exploration. We investigated  $\lambda$  values of  $\{0.0, 0.1, 0.5, 1.0\}$  in the

Table 3: Hyper-parameters of CSVE evaluation

| Hyper-parameters | Value and description                                                                                                                            |
|------------------|--------------------------------------------------------------------------------------------------------------------------------------------------|
| B                | 5, number of ensembles in dynamics model                                                                                                         |
| $\alpha$         | 10, to control the penalty of out-of-distribution states                                                                                         |
| $\tau$           | 10, budget parameter in Eq. 8                                                                                                                    |
| $\beta$          | In Gym domain, 3 for random and medium tasks, 0.1 for the other tasks;<br>In Adroit domain, 30 for human and cloned tasks, 0.01 for expert tasks |
| $\gamma$         | 0.99, discount factor.                                                                                                                           |
| H                | 1 million for Mujoco while 0.1 million for Adroit tasks.                                                                                         |
| w                | 0.005, target network smoothing coefficient.                                                                                                     |
| lr of actor      | 3e-4, policy learning rate                                                                                                                       |
| lr of critic     | 1e-4, critic learning rate                                                                                                                       |

513 medium tasks, fixing  $\beta = 0.1$ . The results are plotted in Fig. 2. As shown in the upper figures,  $\lambda$  has  
 514 obvious effect to policy performance and variances during training. With increasing  $\lambda$  from 0, the  
 515 converged performance gets better in general. However, when the  $\lambda$  becomes too large (e.g.,  $\lambda = 3$   
 516 for hopper and walker2d), the performance may degrade or even collapse. By further investigating  
 517 the  $L_\pi$  loss in Eq.9, as shown in the bottom figures, we found that larger  $\lambda$  values have negative effect  
 518 to  $L_\pi$ ; however, once  $L_\pi$  converges low reasonably, the bigger  $\lambda$  leads to performance improvement.

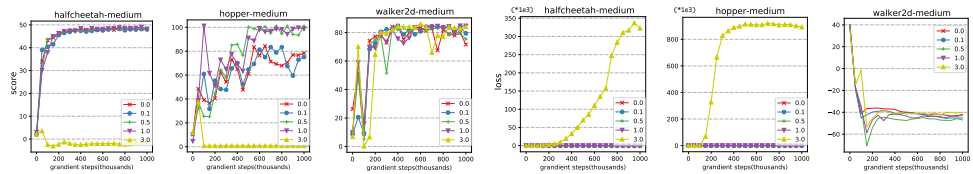

Figure 2: Effect of  $\lambda$  to performance scores (upper figures) and losses (bottom figures) in Eq. 9 on medium tasks.

519 **Effect of model errors.** Compared to traditional model-based offline RL algorithms, CSVE is less  
 520 affected by model biases. To measure this quantitatively, we studied the impact of model biases on  
 521 performance by using the average L2 error on transition prediction as a surrogate for model biases.  
 522 As shown in Fig. 3, the effect of model bias on RL performance is subtle in CSVE. Specifically, for  
 523 the halfcheetah task, there is no observable impact of model errors on scores, while in the hopper and  
 524 walker2d tasks, there is only a slight decrease in scores as the errors increase.

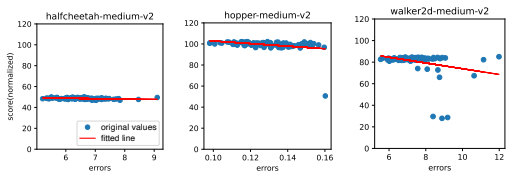

Figure 3: Effect of the model biases to performance scores. The correlation coefficient is  $-0.32$ ,  $-0.34$ , and  $-0.29$  respectively.

## 525 C Experimental Details and Complementary Results

### 526 C.1 Hyper-parameters of CSVE evaluation in experiments

527 The detailed hyper-parameters of CSVE used in experiments are provided in Table 3.

### 528 C.2 More experiments on hyper-parameters effect

529 We also investigated  $\lambda$  values of  $\{0.0, 0.5, 1.0, 3.0\}$  in the medium-replay tasks. The results are  
 530 shown in Fig. 2.

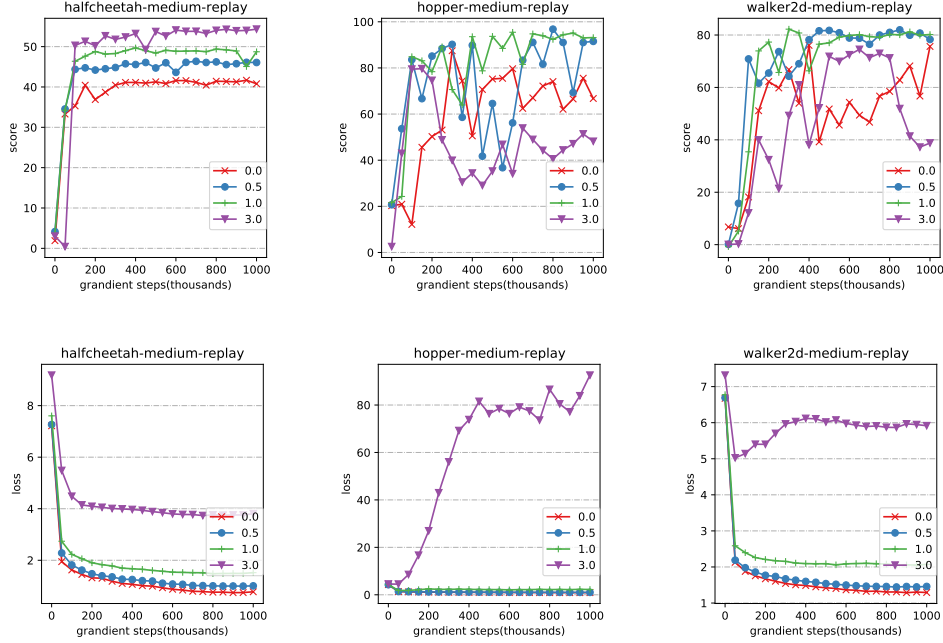

Figure 4: Effect of  $\lambda$  to Score (upper figures) and  $L_\pi$  loss in Eq. 9 (bottom figures)

### 531 C.3 Details of Baseline CQL-AWR

532 In order to directly compare effect of the conservative state value estimation against Q value estimation,  
 533 we implement a baseline method namely CQL-AWR as follows:

$$\hat{Q}^{k+1} \leftarrow \arg \min_Q \alpha \left( E_{s \sim D, a \sim \pi(a|s)} [Q(s, a)] - E_{s \sim D, a \sim \hat{\pi}_\beta(a|s)} [Q(s, a)] \right) + \frac{1}{2} E_{s, a, s' \sim D} [(Q(s, a) - \hat{\beta}_\pi \hat{Q}^k(s, a))^2]$$

$$\pi \leftarrow \arg \min_{\pi'} L_\pi(\pi') = -E_{s, a \sim D} \left[ \log \pi'(a|s) \exp \left( \beta \hat{A}^{k+1}(s, a) \right) \right] - \lambda E_{s \sim D, a \sim \pi'(s)} \left[ \hat{Q}^{k+1}(s, a) \right]$$

where  $\hat{A}^{k+1}(s, a) = \hat{Q}^{k+1}(s, a) - \mathbb{E}_{a \sim \pi} [\hat{Q}^{k+1}(s, a)]$ .

534 In CQL-AWR, the critic adopts a normal CQL equation, while the policy improvement part uses a  
 535 AWR extended with new action exploration indicated by the conservative Q function. Compared  
 536 to our CSVE implementation, its policy part is similar except that the exploration is Q-based and  
 537 model-free.

### 538 C.4 Reproduction of COMBO

539 In Table 1 of our main paper, our results of COMBO adopt the one presented in literature [23]. Here  
 540 we list other reproducing efforts and results which may be helpful for readers to compare CSVE with  
 541 COMBO.

542 **Official Code.** We preferred to rerun the official COMBO code provided by authors. The code is  
 543 implemented in Tensorflow 1.x and depends on software versions in 2018. We rebuilt the environment  
 544 but still failed to reproduce the results. For example, Fig. 5 shows the asymptotic performance on  
 545 medium datasets until 1000 epochs, in which the scores have been normalized with corresponding  
 546 SAC performance. We found that in both hopper and walker2d, the scores show dramatic fluctuations.  
 547 The average scores of last 10 epochs for halfcheetah, hopper and walker2d are 71.7, 65.3 and -0.26 in  
 548 respect. Besides, we found that even in D4RL v0 dataset, COMBO's behaviours are similar with  
 549 recommended hyper-parameters.

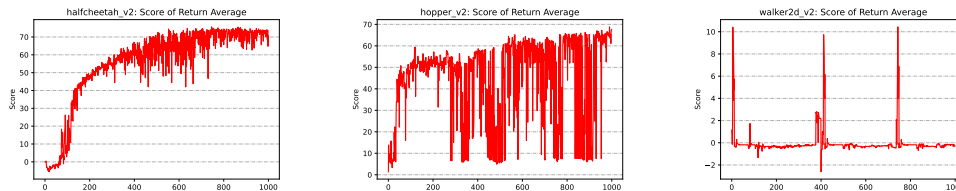

Figure 5: Return of official COMBO implementation on D4RL mujoco v2 tasks, fixing seed=0.

550 **JAX-based optimized implementation Code [34].** We also rerun one recent re-implementation  
 551 in RIQL which is the most highly tuned implementation so far. The results are shown in Fig.6. For  
 552 random and expert datasets, we used the same hyper-parameters same with medium and medium-  
 553 expert respectively. For all other datasets, we used the default hyper-parameters given by authors  
 554 [34]. By comparing with the authors’ results (Table 10 and Fig.7 in [34]), our reproduced results are  
 555 still lower and with larger variances.

### 556 C.5 Effect of Exploration on near Dataset Distributions

557 As discussed in Section 3.1 and 4.2, proper choice of exploration on the distribution ( $d$ ) beyond data  
 558 ( $d_u$ ) should help policy improvement. The factor  $\lambda$  in Eq. 9 controls the trade-off on such ’bonus’  
 559 exploration and complying the data-implied behaviour policy.

560 In section 5.2, we have investigated the effect of  $\lambda$  in medium datasets of mujoco tasks. Now let us  
 561 further take the medium-replay type of datasets for more analysis of its effect. In the experiments,  
 562 with fixed  $\beta = 0.1$ , we investigate  $\lambda$  values of  $\{0.0, 0.5, 1.0, 3.0\}$ . As shown in the upper figures  
 563 in Fig. 4,  $\lambda$  shows obvious effect to policy performance and variances during training. In general,  
 564 there is a value under which increasing  $\lambda$  leads to performance improvement, while above which  
 565 further increasing  $\lambda$  hurts performance. For example, with  $\lambda = 3.0$  in hopper-medium-replay task  
 566 and walker2d-medium-replay task, the performance get worse than with smaller  $\lambda$  values. The value  
 567 of  $\lambda$  is task-specific, and we find that its effect is highly related to the loss in Eq. 9 which can be  
 568 observed by comparing bottom and upper figures in Fig. 4. Thus, in practice, we can choose proper  $\lambda$   
 569 according to the above loss without online interaction.

### 570 C.6 Conservative State Value Estimation by Perturbing Data State with Noise

571 In this section, we investigate a model-free method for sampling OOD states, and compare its results  
 572 with the model-based method adopted in our implementation in section 4.

573 The model-free method samples OOD states by randomly adding Gaussian noise to the sampled  
 574 states from data. Specifically, we replace the Eq.5 with the following Eq. 33, and other parts are same  
 575 as previous.

$$\hat{V}^{k+1} \leftarrow \arg \min_V L_V^\pi(V; \hat{Q}^k) = \alpha (E_{s \sim D, s' = s + N(0, \sigma^2)}[V(s')] - E_{s \sim D}[V(s)]) + E_{s \sim D} \left[ (E_{a \sim \pi(\cdot|s)}[\hat{Q}^k(s, a)] - V(s))^2 \right]. \quad (33)$$

576 The experimental results on mujoco control tasks are summarized in Table 4. As shown, with different  
 577 noise levels ( $\sigma^2$ ), the model-free CSVE may performs better or worse than our original model-based  
 578 CSVE implementation; and for some problems, the model-free method show very large variances  
 579 across seeds. Intuitively, if the noise level covers the reasonable state distribution around data, its  
 580 performance is good; otherwise, it misbehaves. Unfortunately, it is hard to find a noise level that is  
 581 consistent for different tasks or even the same tasks with different seeds.

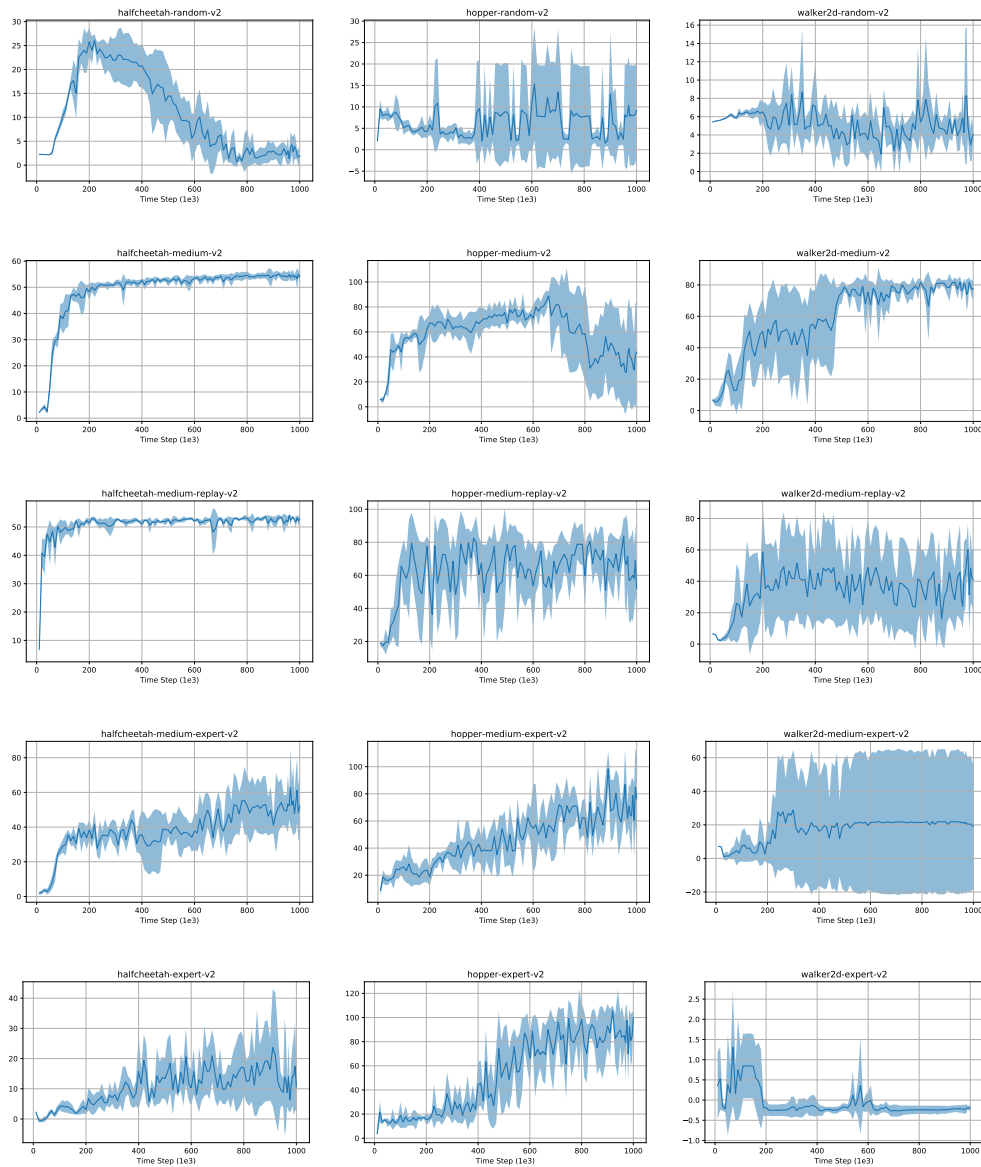

Figure 6: Return of an optimized COMBO implementation[34] on D4RL mujoco v2 tasks. The data are got by running with 5 seeds for each task, and the dynamics model has 7 ensembles.



Table 4: Performance comparison on Gym control tasks. The results of different noise levels is over three seeds.

|                  |             | CQL              | CSVE            | $\sigma^2=0.05$ | $\sigma^2=0.1$  | $\sigma^2=0.15$ |
|------------------|-------------|------------------|-----------------|-----------------|-----------------|-----------------|
| Random           | HalfCheetah | 17.5 $\pm$ 1.5   | 26.7 $\pm$ 2.0  | 20.8 $\pm$ 0.4  | 20.4 $\pm$ 1.3  | 18.6 $\pm$ 1.1  |
|                  | Hopper      | 7.9 $\pm$ 0.4    | 27.0 $\pm$ 8.5  | 4.5 $\pm$ 3.1   | 14.2 $\pm$ 15.3 | 6.7 $\pm$ 5.4   |
|                  | Walker2D    | 5.1 $\pm$ 1.3    | 6.1 $\pm$ 0.8   | 3.9 $\pm$ 3.8   | 7.5 $\pm$ 6.9   | 1.7 $\pm$ 3.5   |
| Medium           | HalfCheetah | 47.0 $\pm$ 0.5   | 48.6 $\pm$ 0.0  | 48.2 $\pm$ 0.2  | 47.5 $\pm$ 0.0  | 46.0 $\pm$ 0.9  |
|                  | Hopper      | 53.0 $\pm$ 28.5  | 99.4 $\pm$ 5.3  | 36.9 $\pm$ 32.6 | 46.1 $\pm$ 2.1  | 18.4 $\pm$ 30.6 |
|                  | Walker2D    | 73.3 $\pm$ 17.7  | 82.5 $\pm$ 1.5  | 81.5 $\pm$ 1.0  | 75.5 $\pm$ 1.9  | 78.6 $\pm$ 2.9  |
| Medium<br>Replay | HalfCheetah | 45.5 $\pm$ 0.7   | 54.8 $\pm$ 0.8  | 44.8 $\pm$ 0.4  | 44.1 $\pm$ 0.5  | 43.8 $\pm$ 0.4  |
|                  | Hopper      | 88.7 $\pm$ 12.9  | 91.7 $\pm$ 0.3  | 85.5 $\pm$ 3.0  | 78.3 $\pm$ 4.3  | 70.2 $\pm$ 12.0 |
|                  | Walker2D    | 81.8 $\pm$ 2.7   | 78.5 $\pm$ 1.8  | 78.7 $\pm$ 3.3  | 76.8 $\pm$ 1.3  | 66.8 $\pm$ 4.0  |
| Medium<br>Expert | HalfCheetah | 75.6 $\pm$ 25.7  | 93.1 $\pm$ 0.3  | 87.5 $\pm$ 6.0  | 89.7 $\pm$ 6.6  | 93.8 $\pm$ 1.6  |
|                  | Hopper      | 105.6 $\pm$ 12.9 | 95.2 $\pm$ 3.8  | 63.2 $\pm$ 54.4 | 99.0 $\pm$ 11.0 | 37.6 $\pm$ 63.9 |
|                  | Walker2D    | 107.9 $\pm$ 1.6  | 109.0 $\pm$ 0.1 | 108.4 $\pm$ 1.9 | 109.5 $\pm$ 1.3 | 110.4 $\pm$ 0.6 |
| Expert           | HalfCheetah | 96.3 $\pm$ 1.3   | 93.8 $\pm$ 0.1  | 59.0 $\pm$ 28.6 | 67.5 $\pm$ 21.9 | 75.3 $\pm$ 27.3 |
|                  | Hopper      | 96.5 $\pm$ 28.0  | 111.2 $\pm$ 0.6 | 67.3 $\pm$ 57.7 | 109.2 $\pm$ 2.4 | 109.4 $\pm$ 2.1 |
|                  | Walker2D    | 108.5 $\pm$ 0.5  | 108.5 $\pm$ 0.0 | 109.7 $\pm$ 1.1 | 108.9 $\pm$ 1.6 | 108.6 $\pm$ 0.3 |
